RESEARCH ARTICLE

# Association of *PDE4B* Polymorphisms with Susceptibility to Schizophrenia: A Meta-Analysis of Case-Control Studies

Yanguo Feng, Dejun Cheng, Chaofeng Zhang, Yuchun Li, Zhiying Zhang, Juan Wang, Yuzhong Shi\*

Department of Psychiatry, Henan Mental Hospital, The Second Affiliated Hospital of Xinxiang Medical University, Xinxiang, China

\* [syzscience123@163.com](mailto:syzscience123@163.com)

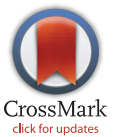

## Abstract

### Background

The *PDE4B* single nucleotide polymorphisms (SNPs) have been reported to be associated with schizophrenia risk. However, current findings are ambiguous or even conflicting. To better facilitate the understanding the genetic role played by *PDE4B* in susceptibility to schizophrenia, we collected currently available data and conducted this meta-analysis.

### Methods

A comprehensive electronic literature searching of PubMed, Embase, Web of Science and Cochrane Library was performed. The association between *PDE4B* SNPs and schizophrenia was evaluated by odds ratios (ORs) and 95% confidence intervals (CIs) under allelic, dominant and recessive genetic models. The random effects model was utilized when high between-study heterogeneity ( $I^2 > 50\%$ ) existed, otherwise the fixed effects model was used.

### Results

Five studies comprising 2376 schizophrenia patients and 3093 controls were finally included for meta-analysis. The rs1040716 was statistically significantly associated with schizophrenia risk in Asian and Caucasian populations under dominant model (OR = 0.87, 95% CI: 0.76–0.99,  $P = 0.04$ ). The rs2180335 was significantly related with schizophrenia risk in Asian populations under allelic (OR = 0.82, 95% CI: 0.72–0.93,  $P = 0.003$ ) and dominant (OR = 0.75, 95% CI: 0.64–0.88,  $P < 0.001$ ) models. A significant association was also observed between rs4320761 and schizophrenia in Asian populations under allelic model (OR = 0.87, 95% CI: 0.75–1.00,  $P = 0.048$ ). In addition, a strong association tendency was found between rs6588190 and schizophrenia in Asian populations under allelic model (OR = 0.87, 95% CI: 0.76–1.00,  $P = 0.055$ ).

### Conclusion

This meta-analysis suggests that *PDE4B* SNPs are genetically associated with susceptibility to schizophrenia. However, due to limited sample size, more large-scale, multi-racial

## OPEN ACCESS

**Citation:** Feng Y, Cheng D, Zhang C, Li Y, Zhang Z, Wang J, et al. (2016) Association of *PDE4B* Polymorphisms with Susceptibility to Schizophrenia: A Meta-Analysis of Case-Control Studies. PLoS ONE 11(1): e0147092. doi:10.1371/journal.pone.0147092

**Editor:** Robert M Lafrenie, Sudbury Regional Hospital, CANADA

**Received:** August 6, 2015

**Accepted:** December 26, 2015

**Published:** January 12, 2016

**Copyright:** © 2016 Feng et al. This is an open access article distributed under the terms of the [Creative Commons Attribution License](https://creativecommons.org/licenses/by/4.0/), which permits unrestricted use, distribution, and reproduction in any medium, provided the original author and source are credited.

**Data Availability Statement:** All relevant data are within the paper and its Supporting Information files.

**Funding:** The authors have no support or funding to report.

**Competing Interests:** The authors have declared that no competing interests exist.

association studies are needed to further clarify the genetic association between various *PDE4B* variants and schizophrenia.

## Introduction

Susceptibility to schizophrenia has been considered to be inextricably related to genetic factors [1–4]. Twin studies have yielded heritability estimates of over 80% for schizophrenia, providing important genetic evidence for schizophrenia pathogenesis [5, 6]. In particular, to pinpoint genetic vulnerability to schizophrenia, genome-wide association studies have identified a number of single nucleotide polymorphisms (SNPs) within genes significantly associated with schizophrenia risk [7, 8].

Among various candidate genes for schizophrenia, the gene *phosphodiesterase 4B* (*PDE4B*), which is located on human chromosome 1 at 1p31 and composed of 17 exons spanning 580 kb [9], belongs to *PDE4* families. Like other adenosine 3', 5'-monophosphate (cAMP) phosphodiesterases, *PDE4B* participates in cAMP signaling process by specifically inactivating cAMP [10]. Interestingly, mutations of fruit fly *dunce* gene, encoding an ortholog of mammalian *PDE4*, resulted in high levels of cAMP and deficiencies in olfactory learning and memory [11]. *PDE4B* was first implicated as a candidate risk gene for schizophrenia through investigating chromosomal abnormalities of two cousins, the proband of whom was diagnosed with schizophrenia [12]. Specifically, these cousins were both identified to carry a balanced t(1;16) (p31.2;q21) translocation and the locus encoding *PDE4B* was disrupted by the 1p31.2 translocation breakpoint [12]. In addition, disrupted in schizophrenia 1 (*DISC1*), another putative susceptibility factor for schizophrenia [13–17], was identified to interact with UCR2 domain of *PDE4B* and elevated cAMP contributed to decreased binding of *PDE4B* to *DISC1* and an increase in *PDE4B* activity [12]. Therefore, it is highly probable that functional variants of *PDE4B* would affect multiple events, including interaction with *DISC1*, cAMP metabolism signaling and its cAMP hydrolyzing activity, with a concomitant complicated psychiatric outcome.

What is important, a genome-wide linkage analysis [18] in ethnically homogeneous pedigrees has provided strong evidence for schizophrenia risk locus on chromosome 1p31.1, to which the nearest schizophrenia candidate gene is *PDE4B*. Additionally, they identified 14 SNPs of *PDE4B* gene associated with schizophrenia under a nominal *P* value of 0.05 [18]. Indeed, there have been accumulating studies investigating association of *PDE4B* variations with predisposition to schizophrenia across multi-ethnic populations, including Caucasian populations (Europeans [19–21], Caucasian Canadians [22] and Caucasian Americans [23]), Asian populations (Indians [18], Japanese [24], Chinese [25] and Koreans [26]), and African populations (African Americans [23]). The only meta-analysis concerning the association of *PDE4B* SNPs and schizophrenia was taken in Bae's study [26], which just combined Korean population in their own study and Japanese population in Numata's study [24]. Another limitation of their meta-analysis is that it merely involves rs1040716 under dominant model and rs599381, rs2180335 and rs472952 under co-dominant model. Therefore, to better facilitate our interpretation of *PDE4B* SNPs as risk factors for schizophrenia and comprehensively evaluate the association between diverse SNPs and schizophrenia, we conducted this meta-analysis of published case-control studies across multi-ethnic populations under multi-genetic models.

## Methods and Materials

### Search strategy and Inclusion criteria

We conducted a comprehensive electronic literature searching of MEDLINE (PubMed), Embase (Ovid), Web of Science (Thomson-Reuters) and Cochrane Library (Wiley) from

establishment date to August 2015. To maximize search scope and minimize the chance of missing relevant studies, we used a simple term combination strategy. The search terms and their combination manner were presented below: (“schizophrenia” OR “schizophrenic”) AND (“PDE4B” OR “phosphodiesterase 4B”). With this search strategy, there were 59, 86, 70, and 0 citations obtained from Pubmed, Embase, Web of Science and Cochrane Library, respectively. After excluding duplicates, there were 121 citations retrieved from these four electronic databases. In addition, to supplement the electronic search, we also manually searched reference lists of key studies and reviews for additional relevant studies, but no additional studies were obtained.

The eligible studies should satisfy the following criteria: (1) case-control studies; (2) written in English; (3) providing sufficient data to calculate the odds ratios (ORs) and 95% confidence intervals (CIs); (4) allele frequency and genotype distribution of control population must be in Hardy-Weinberg equilibrium; (5) stating that well-informed consent was acquired from all participants.

## Data extraction and quality assessment

For each included study, the following data were collected: the first author’s last name, publication year, country, ethnicity, numbers of cases and controls, diagnosis criteria, gender distribution, age and Hardy-Weinberg equilibrium. We calculated the ORs and 95% CIs, if they are not provided in original studies. Two researchers independently performed data extraction and discrepancy was resolved through discussion or referred to a third researcher.

The quality of the included studies was evaluated through a checklist originated from Strengthening the Reporting of Genetic Association (STREGA) recommendations for reports on genetic association studies [27] and modified according to the quality checklist depicted elsewhere [28].

## Meta-analysis

Heterogeneity between studies was evaluated by Cochran’s *Q* test and *I* squared ( $I^2$ ) statistics. If substantial heterogeneity was detected ( $P < 0.1$  or  $I^2 > 50\%$ ), the random effects model (the DerSimonian-Laird method) was employed; otherwise the fixed effects model (the Mantel-Haenszel method or the Inverse Variance method) was utilized. We assessed the association strength by using ORs and 95% CIs and the significance of pooled ORs was examined by *Z* test. To reflect the influence of a single study on between-study heterogeneity and the pooled effect sizes, we excluded one study each time and then observed the corresponding changes. To estimate potential publication bias, we performed trim and fill analysis [29]. The level of statistically significant differences was still considered at 0.05 without re-estimating significance thresholds, since the original data in this meta-analysis were not derived from high-throughput genome-wide association studies [30]. All analyses were conducted with Stata/SE 11.2 software (StataCorp., TX, USA).

## Results

### Study selection and characteristics of included studies

The PRISMA flow diagram of literature search was shown (Fig 1). In brief, after excluding duplicates, there were 121 citations retrieved. Next, 106 irrelevant citations were excluded through screening of titles and abstracts and 15 articles were assessed for eligibility. After excluding seven citations for being not case-control studies, two studies [19, 23] for insufficient data, though we tried to contact the authors for more information, and one study written in

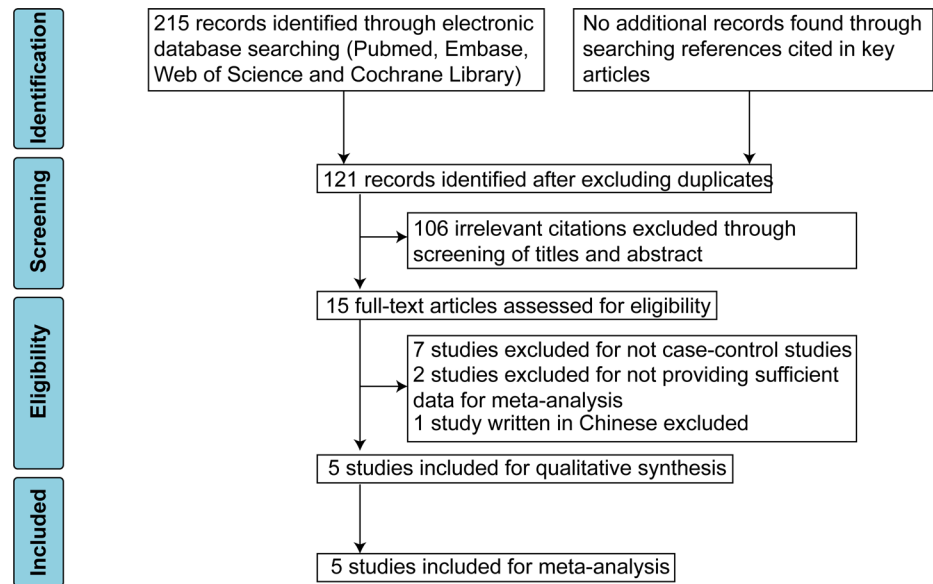

**Fig 1. PRISMA flow diagram showing study selection process.**

doi:10.1371/journal.pone.0147092.g001

Chinese, five case-control studies [21, 22, 24–26] were finally included for this meta-analysis. The excluded articles and reasons were listed in [S1 Text](#).

Main characteristics of the five included studies were described in [Table 1](#). Briefly, two main ethnic populations, including Asians and Caucasians, from seven countries were involved in this study. In addition, *PDE4B* SNPs investigated in five studies are listed in [Table 2](#). To appraise the quality of these included studies, a modified checklist was also provided in [Table 3](#).

### Location and potential function of SNPs in this meta-analysis

We searched for SNPs included into our meta-analysis at <http://www.ncbi.nlm.nih.gov/snp/> and tabulated the information including locations and possible functions of these SNPs in [Table 4](#).

**Table 1. Characteristics of included studies.** M/F: male/female. SD: standard deviation. HWE: Hardy-Weinberg equilibrium. DSM-IV: Diagnostic Statistical Manual of Mental Disorders IV. ICD-10: International Classification of Diseases-10. NA: not available.

| First author (publication year) | Country                     | Ethnicity                                                                 | Sample size (Case/Control) | Diagnosis criteria | Gender (M/F) |         | Age (mean ± SD or range)    |                             | HWE |
|---------------------------------|-----------------------------|---------------------------------------------------------------------------|----------------------------|--------------------|--------------|---------|-----------------------------|-----------------------------|-----|
|                                 |                             |                                                                           |                            |                    | Case         | Control | Case (M/F)                  | Control (M/F)               |     |
| Numata (2008)                   | Japan                       | Asian                                                                     | 444/452                    | DSM-IV             | 265/179      | 271/181 | 48.4 ± 13.9/<br>48.4 ± 15.0 | 48.7 ± 12.1/<br>47.5 ± 12.7 | yes |
| Guan (2012)                     | China                       | Asian                                                                     | 428/572                    | DSM-IV             | 226/202      | 298/274 | 38.4 ± 11.5/<br>35.8 ± 10.9 | 31.3 ± 11.2/<br>34.7 ± 11.3 | yes |
| Bae (2015)                      | Korea                       | Asian                                                                     | 457/386                    | DSM-IV             | 255/202      | 217/169 | 44.78 (23–76)               | 54.72 (28–79)               | yes |
| Kahler (2010)                   | Norway, Sweden, and Denmark | Caucasian                                                                 | 837/1473                   | DSM-IV/ICD-10      | 489/348      | 848/625 | NA                          | NA                          | yes |
| Rastogi (2009)                  | Canada                      | 85% Caucasian, 7% African-American, 6% Asian, 1% East Indian and 1% other | 210/210                    | DSM-IV             | NA           | NA      | NA                          | NA                          | yes |

doi:10.1371/journal.pone.0147092.t001

**Table 2. *PDE4B* SNPs investigated in each study.** “+”: the SNP was investigated in the study. “-”: the SNP was not investigated in in the study.

|           | Numata (2008) Japanese | Guan (2012) Chinese | Bae (2015) Korean | Kahler (2010) Caucasian | Rastogi (2009) Mainly Caucasian |
|-----------|------------------------|---------------------|-------------------|-------------------------|---------------------------------|
| rs599381  | +                      | +                   | +                 | +                       | -                               |
| rs1040716 | +                      | +                   | +                 | +                       | -                               |
| rs472952  | +                      | +                   | +                 | -                       | -                               |
| rs2180335 | +                      | +                   | +                 | -                       | -                               |
| rs910694  | +                      | +                   | -                 | -                       | +                               |
| rs4320761 | +                      | +                   | -                 | -                       | -                               |
| rs498448  | +                      | +                   | -                 | -                       | -                               |
| rs6588190 | +                      | +                   | -                 | -                       | -                               |

doi:10.1371/journal.pone.0147092.t002

### Meta-analyses of association between different *PDE4B* SNPs and susceptibility to schizophrenia in allelic model

For rs599381, no significant association was observed between this SNP and schizophrenia across Asian (including Japanese, Chinese and Koreans) and Caucasian (Northern Europeans) populations (OR = 0.96, 95% CI: 0.85–1.07,  $P = 0.443$ ; Fig 2, Table 5). For Asian (including Japanese, Chinese and Koreans) subgroup analysis, no significant association was identified between rs599381 and schizophrenia (OR = 0.99, 95% CI: 0.82–1.20,  $P = 0.941$ ; Table 5).

For rs1040716, no significant association was found between this SNP and schizophrenia across Asian (including Japanese, Chinese and Koreans) and Caucasian (Northern Europeans) populations (OR = 1.06, 95% CI: 0.89–1.25,  $P = 0.537$ ; Fig 2, Table 5). For Asian (including Japanese, Chinese and Koreans) subgroup analysis, no significant association was noticed between rs1040716 and schizophrenia (OR = 1.11, 95% CI: 0.89–1.40,  $P = 0.348$ ; Table 5).

For rs910694, there is no significant association between rs910694 and schizophrenia in the mixed populations across the studies of Numata, Guan and Rastogi (OR = 0.89, 95% CI: 0.62–1.29,  $P = 0.542$ ; Fig 2, Table 5). For Asian subgroup (including Japanese and Chinese) analysis, still no significant association was found (OR = 0.89, 95% CI: 0.50–1.58,  $P = 0.685$ ; Table 5).

For rs472952, no significant association was determined between the SNP and schizophrenia within Asian populations, including Japanese, Chinese and Koreans (OR = 0.94, 95% CI: 0.63–1.39,  $P = 0.747$ ; Fig 2, Table 5).

For rs2180335, a significant association was noted between the SNP and schizophrenia across Asian populations, including Japanese, Chinese and Koreans (OR = 0.82, 95% CI: 0.72–0.93,  $P = 0.003$ ; Fig 2, Table 5).

For rs4320761, a significant association was seen between the SNP and schizophrenia across Asian populations, including Japanese and Chinese (OR = 0.87, 95% CI: 0.75–1.00,  $P = 0.048$ ; Fig 2, Table 5).

**Table 3. Quality assessment of included studies.** “+”: detailed description; “±”: incomplete description; “-”: no description.

| Last name of first author | Year | Clear description of background, objectives and study design | Clear eligibility criteria | Clear definition of variables | Credible genotyping methods | Hardy-Weinberg equilibrium assessment | Clear description of statistical methods | Summary of characteristics of participants | Publicly available genotype data | Comprehensive discussion |
|---------------------------|------|--------------------------------------------------------------|----------------------------|-------------------------------|-----------------------------|---------------------------------------|------------------------------------------|--------------------------------------------|----------------------------------|--------------------------|
| Numata                    | 2008 | +                                                            | +                          | +                             | +                           | +                                     | +                                        | +                                          | +                                | +                        |
| Rastogi                   | 2009 | +                                                            | +                          | +                             | +                           | +                                     | +                                        | ±                                          | +                                | +                        |
| Kahler                    | 2010 | +                                                            | +                          | +                             | +                           | +                                     | +                                        | ±                                          | +                                | +                        |
| Guan                      | 2012 | +                                                            | +                          | +                             | +                           | +                                     | +                                        | +                                          | +                                | +                        |
| Bae                       | 2015 | +                                                            | +                          | +                             | +                           | +                                     | +                                        | +                                          | ±                                | +                        |

doi:10.1371/journal.pone.0147092.t003

**Table 4. Location and potential function of SNPs in this meta-analysis.**

| SNP ID    | Chromosome | Position | Intron Number | Functional Consequence |
|-----------|------------|----------|---------------|------------------------|
| rs599381  | 1          | 66294877 | Intron 7      | Intron variant         |
| rs1040716 | 1          | 66311907 | Intron 7      | Intron variant         |
| rs472952  | 1          | 66335081 | Intron 8      | Intron variant         |
| rs2180335 | 1          | 66320247 | Intron 7      | Intron variant         |
| rs910694  | 1          | 66330543 | Intron 7      | Intron variant         |
| rs4320761 | 1          | 66245285 | Intron 3      | Intron variant         |
| rs498448  | 1          | 66301097 | Intron 7      | Intron variant         |
| rs6588190 | 1          | 66231685 | Intron 3      | Intron variant         |

doi:10.1371/journal.pone.0147092.t004

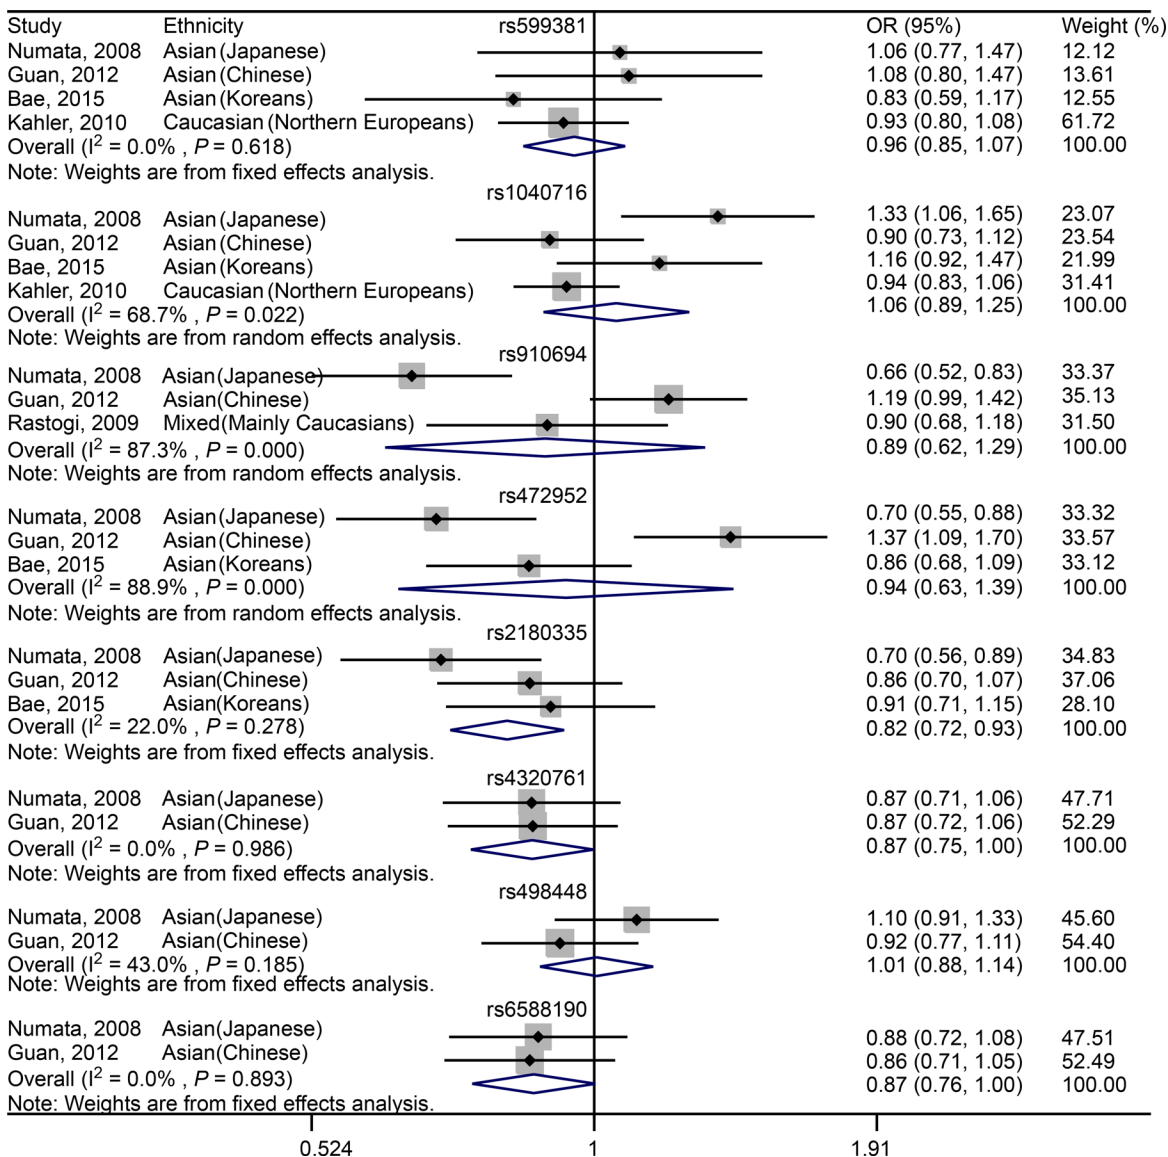

**Fig 2. Forest plot showing the association between *PDE4B* SNPs and schizophrenia under allelic model.**

doi:10.1371/journal.pone.0147092.g002

**Table 5. Overall analysis of association of *PDE4B* SNP with schizophrenia risk.**

| SNP       | Allele | Ethnicity        | Cohort number | Case/Control | Genetic model | OR (95% CI)       | Z score | P(Z)                | I <sup>2</sup> (%) |
|-----------|--------|------------------|---------------|--------------|---------------|-------------------|---------|---------------------|--------------------|
| rs599381  | C>T    | Asian/Caucasian  | 4             | 2165/2881    | T vs. C       | 0.96 (0.85, 1.07) | 0.77    | 0.443               | 0                  |
|           |        |                  |               |              | TT+TC vs. CC  | 0.98 (0.86, 1.12) | 0.31    | 0.759               | 0                  |
|           |        |                  |               |              | TT vs. TC+CC  | 0.92 (0.65, 1.31) | 0.47    | 0.64                | 0                  |
|           |        | Asian subgroup   | 3             | 1329/1409    | T vs. C       | 0.99 (0.82, 1.20) | 0.07    | 0.941               | 0                  |
|           |        |                  |               |              | TT+TC vs. CC  | 1.07 (0.87, 1.33) | 0.66    | 0.507               | 0                  |
|           |        |                  |               |              | TT vs. TC+CC  | 0.90 (0.48, 1.67) | 0.34    | 0.731               | 0                  |
| rs1040716 | A>T    | Asian/Caucasian  | 4             | 2164/2861    | T vs. A       | 1.06 (0.89, 1.25) | 0.62    | 0.537               | 68.7               |
|           |        |                  |               |              | TT+TA vs. AA  | 0.87 (0.76, 0.99) | 2.06    | <b>0.04 *</b>       | 0                  |
|           |        |                  |               |              | TT vs. TA+AA  | 1.07 (0.80, 1.43) | 0.46    | 0.649               | 61.5               |
|           |        | Asian subgroup   | 3             | 1329/1407    | T vs. A       | 1.11 (0.89, 1.40) | 0.94    | 0.348               | 67.5               |
|           |        |                  |               |              | TT+TA vs. AA  | 0.85 (0.71, 1.03) | 1.68    | <b>0.094 #</b>      | 3.6                |
|           |        |                  |               |              | TT vs. TA+AA  | 1.11 (0.73, 1.69) | 0.49    | 0.621               | 58.9               |
| rs910694  | A>G    | Mixed population | 3             | 1074/1225    | G vs. A       | 0.89 (0.62, 1.29) | 0.61    | 0.542               | 87.3               |
|           |        |                  |               |              | GG+GA vs. AA  | 0.83 (0.51, 1.34) | 0.76    | 0.448               | 85.9               |
|           |        |                  |               |              | GG vs. GA+AA  | 1.10 (0.88, 1.38) | 0.86    | 0.388               | 38.7               |
|           |        | Asian subgroup   | 2             | 872/1023     | G vs. A       | 0.89 (0.50, 1.58) | 0.41    | 0.685               | 93.6               |
|           |        |                  |               |              | GG+GA vs. AA  | 0.81 (0.40, 1.63) | 0.59    | 0.554               | 92.9               |
|           |        |                  |               |              | GG vs. GA+AA  | 1.21 (0.93, 1.57) | 1.44    | 0.150               | 24.3               |
| rs472952  | C>T    | Asian            | 3             | 1329/1410    | T vs. C       | 0.94 (0.63, 1.39) | 0.32    | 0.747               | 88.9               |
|           |        |                  |               |              | TT+TC vs. CC  | 0.85 (0.53, 1.36) | 0.67    | 0.501               | 87.7               |
|           |        |                  |               |              | TT vs. TC+CC  | 0.88 (0.41, 1.89) | 0.32    | 0.749               | 78.4               |
| rs2180335 | C>T    | Asian            | 3             | 1329/1410    | T vs. C       | 0.82 (0.72, 0.93) | 2.99    | <b>0.003 *</b>      | 22                 |
|           |        |                  |               |              | TT+TC vs. CC  | 0.75 (0.64, 0.88) | 3.48    | <b>&lt; 0.001 *</b> | 47.3               |
|           |        |                  |               |              | TT vs. TC+CC  | 0.81 (0.55, 1.18) | 1.12    | 0.264               | 0                  |
| rs4320761 | C>T    | Asian            | 2             | 871/1024     | T vs. C       | 0.87 (0.75, 1.00) | 1.98    | <b>0.048 *</b>      | 0                  |
| rs498448  | T>C    | Asian            | 2             | 872/1024     | C vs. T       | 1.01 (0.88, 1.14) | 0.08    | 0.935               | 43                 |
| rs6588190 | C>T    | Asian            | 2             | 871/1024     | T vs. C       | 0.87 (0.76, 1.00) | 1.92    | <b>0.055 #</b>      | 0                  |

\*,  $P < 0.05$ , showing statistically significant difference.

#,  $P < 0.1$ , showing strong association tendency.

doi:10.1371/journal.pone.0147092.t005

For rs498448, no significant association was detected between the SNP and schizophrenia across Asian populations, including Japanese and Chinese (OR = 1.01, 95% CI: 0.88–1.14,  $P = 0.935$ ; Fig 2, Table 5).

For rs6588190, a strong tendency rather than statistically significant association was revealed between the SNP and schizophrenia in Asian populations, including Japanese and Chinese (OR = 0.87, 95% CI: 0.76–1.00,  $P = 0.055$ ; Fig 2, Table 5).

### Meta-analyses of association between different *PDE4B* SNPs and schizophrenia under dominant and recessive genetic models

For rs599381, no significant association was found between the SNP and susceptibility to schizophrenia in Asian (including Japanese, Chinese and Koreans) and Caucasian (Northern Europeans) populations under either dominant (OR = 0.98, 95% CI: 0.86–1.12,  $P = 0.759$ ; Fig 3, Table 5) or recessive (OR = 0.92, 95% CI: 0.65–1.31,  $P = 0.64$ ; Fig 4, Table 5) genetic model. For Asian (including Japanese, Chinese and Koreans) subgroup analysis, there is still no significant association between rs599381 and schizophrenia, in either dominant (OR = 1.07, 95% CI:

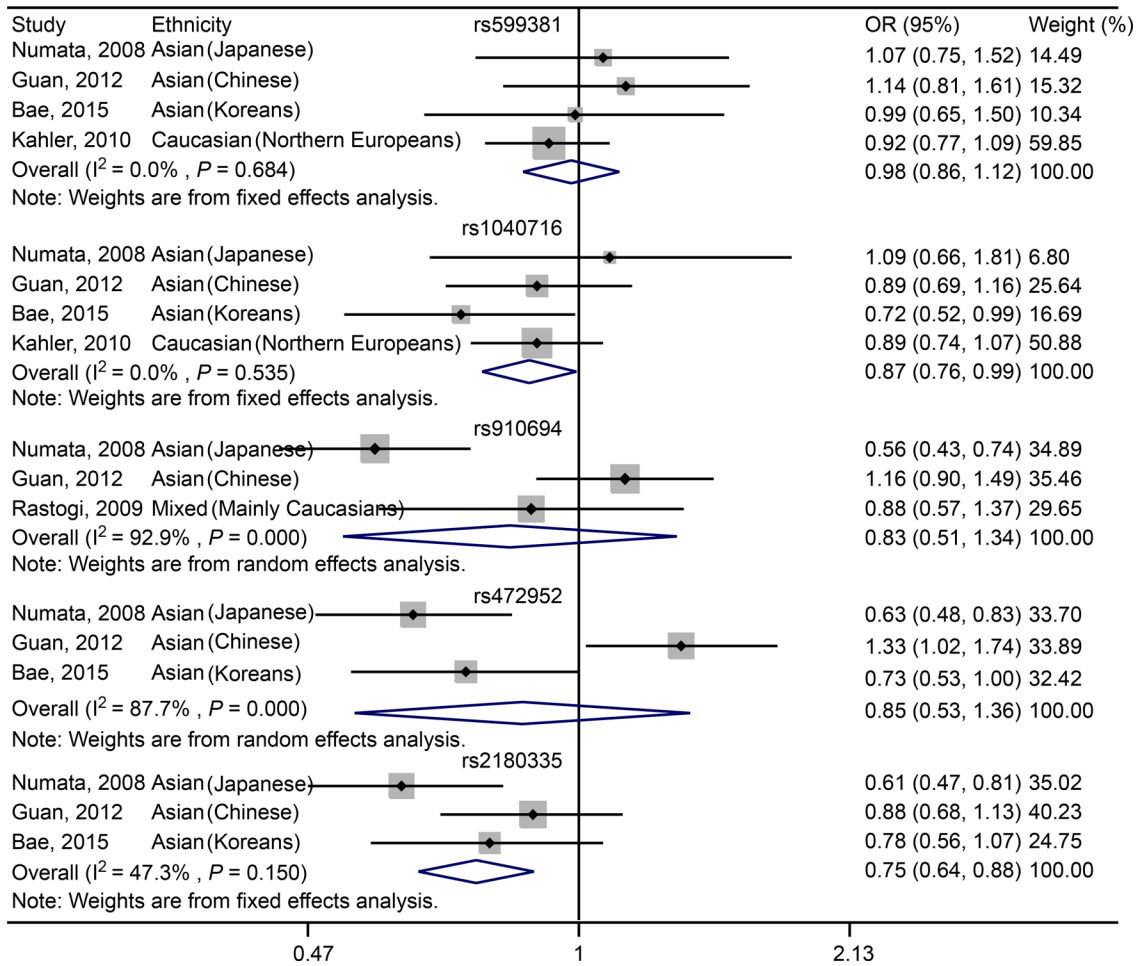

**Fig 3. Forest plot showing the association between *PDE4B* SNPs and schizophrenia under dominant model.**

doi:10.1371/journal.pone.0147092.g003

0.87–1.33,  $P = 0.507$ ; [Table 5](#)) or recessive (OR = 0.90, 95% CI: 0.48–1.67,  $P = 0.731$ ; [Table 5](#)) model.

For rs1040716, a significant association was characterized between the SNP and susceptibility to schizophrenia in Asian (including Japanese, Chinese and Koreans) and Caucasian (Northern Europeans) populations in dominant model (OR = 0.87, 95% CI: 0.76–0.99,  $P = 0.04$ ; [Fig 3](#), [Table 5](#)). However, under recessive model, there is no significant association was observed in Asian (including Japanese, Chinese and Koreans) and Caucasian (Northern Europeans) populations (OR = 1.07, 95% CI: 0.80–1.43,  $P = 0.649$ ; [Fig 4](#), [Table 5](#)). For Asian subgroup (including Japanese, Chinese and Koreans) analysis, no statistically significant association was found under dominant model (OR = 0.85, 95% CI: 0.71–1.03,  $P = 0.094$ ; [Table 5](#)). Additionally, in recessive model, no significant association was characterized (OR = 1.11, 95% CI: 0.73–1.69,  $P = 0.621$ ; [Table 5](#)).

For rs910694, no significant association was found between the SNP and schizophrenia in the Mixed populations across the studies of Numata, Guan and Rastogi in either dominant (OR = 0.83, 95% CI: 0.51–1.34,  $P = 0.448$ ; [Fig 3](#), [Table 5](#)) or recessive (OR = 1.10, 95% CI: 0.88–1.38,  $P = 0.388$ ; [Fig 4](#), [Table 5](#)) model. For Asian (including Japanese and Chinese) subgroup analysis, there is still no significant association was characterized in either dominant (OR = 0.81, 95% CI: 0.40–1.63,  $P = 0.55$ ; [Table 5](#)) or recessive (OR = 1.21, 95% CI: 0.93–1.57,  $P = 0.15$ ; [Table 5](#)) model.



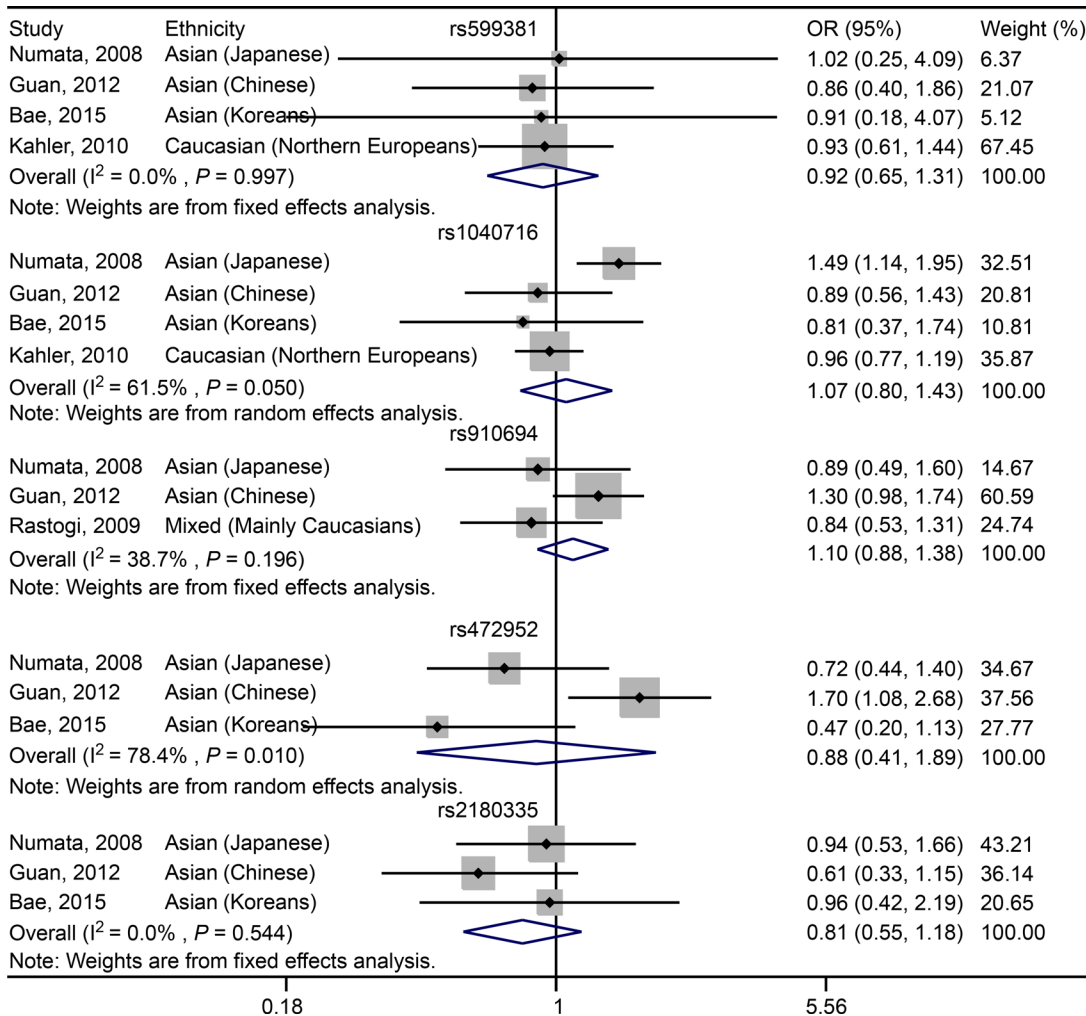

**Fig 4. Forest plot showing the association between *PDE4B* SNPs and schizophrenia under recessive model.**

doi:10.1371/journal.pone.0147092.g004

For rs472952, no significant association was determined between the SNP and susceptibility to schizophrenia in Asian populations, including Japanese, Chinese and Koreans, in either dominant (OR = 0.85, 95% CI: 0.53–1.36,  $P = 0.501$ ; Fig 3, Table 5) or recessive (OR = 0.88, 95% CI: 0.41–1.89,  $P = 0.749$ ; Fig 4, Table 5) model.

For rs2180335, a significant association was detected between the variant and schizophrenia in Asian populations, including Japanese, Chinese and Koreans, under dominant genetic model (OR = 0.75, 95% CI: 0.64–0.88,  $P < 0.001$ ; Fig 3, Table 5). However, under recessive model, no significant association was revealed (OR = 0.81, 95% CI: 0.55–1.18,  $P = 0.264$ ; Fig 4, Table 5).

To conclude, the pooled analyses regarding association of *PDE4B* SNPs with schizophrenia under allelic, dominant and recessive models were summarized in Table 5.

### Sensitivity analysis

To test the influence of one individual study to the overall effect sizes, we performed sensitivity analysis of rs599381, rs1040716, rs472952 and rs2180335. For other SNPs, sensitivity analysis was not taken due to limited number of data sets. The results of sensitivity analysis were shown in Table 6.

**Table 6. Sensitivity analysis of meta-analysis.** The OR (95% CI) and *P* (*Z*) in this table are calculated when omitting the sensitive study.

| SNP       | Genetic model | Sensitive study | OR (95% CI)       | <i>P</i> ( <i>Z</i> ) |
|-----------|---------------|-----------------|-------------------|-----------------------|
| rs599381  | T vs. C       | none            |                   |                       |
|           | TT+TC vs. CC  | none            |                   |                       |
|           | TT vs. TC+CC  | none            |                   |                       |
| rs1040716 | T vs. A       | none            |                   |                       |
|           | TT+TA vs. AA  | Guan, 2012      | 0.87 (0.74, 1.01) | 0.061                 |
|           |               | Bae, 2015       | 0.91 (0.78, 1.05) | 0.174                 |
|           |               | Kahler, 2010    | 0.85 (0.71, 1.03) | 0.094                 |
|           | TT vs. TA+AA  | none            |                   |                       |
| rs910694  | G vs. A       | none            |                   |                       |
|           | GG+GA vs. AA  | none            |                   |                       |
|           | GG vs. GA+AA  | none            |                   |                       |
| rs472952  | T vs. C       | Guan, 2012      | 0.77 (0.63, 0.95) | 0.015                 |
|           | TT+TC vs. CC  | Guan, 2012      | 0.67 (0.55, 0.83) | 0.000                 |
|           | TT vs. TC+CC  | none            |                   |                       |
| rs2180335 | T vs. C       | Numata, 2008    | 0.88 (0.75, 1.03) | 0.117                 |
|           | TT+TC vs. CC  | Numata, 2008    | 0.84 (0.69, 1.03) | 0.088                 |
|           | TT vs. TC+CC  | none            |                   |                       |

doi:10.1371/journal.pone.0147092.t006

### Publication bias

To evaluate the potential publication bias in our meta-analysis, we merely employed trim and fill method [29] due to limited number of cohorts. For rs599381 in allelic model, trim and fill analysis showed that no potentially missing studies were found, suggesting that no publication bias existed. Under dominant model, trim and fill analysis revealed two potentially missing negative studies. Importantly, new meta-analysis after filling the two studies still showed no significant association between rs599381 and schizophrenia ( $P = 0.228$ ). Furthermore, when under recessive model, trim and fill analysis found one possible missing study and new meta-analysis after filling this study still showed no significant association ( $P = 0.601$ ). For rs1040716 under allelic model, using trim and fill analysis, no potentially missing study was found, suggesting no publication bias. In dominant model, trim and fill analysis discovered one potentially missing study. Of note, after filling this study, new meta-analysis still revealed a significant association between rs1040716 and schizophrenia risk ( $P = 0.017$ ). In addition, trim and fill analysis predicted no missing study when meta-analysis on rs1040716 is under recessive model.

### Discussion

*PDE4B* was initially reported as a genetic susceptibility factor for schizophrenia in the exploration of chromosomal abnormalities of two psychiatric cousins [12]. Both cousins were identified with a balanced t(1;16) (p31.2;q21) translocation, which disrupted the *PDE4B* gene locus. Regarding the underlying mechanistic role played by *PDE4B* in the pathogenesis of schizophrenia, Millar et al. [12] demonstrated that DISC1, another established risk factor for schizophrenia, interacts with the UCR2 domain of *PDE4B* and increased level of cAMP gives rise to dissociation of *PDE4B* from DISC1 and an increase in *PDE4B* activity. In addition, it has been generally considered that the sole way to inactivate cAMP is through PDE action [10]. Therefore, it is reasonable to speculate that functional variants of *PDE4B* may lead to dysfunction of cAMP signaling and mediate complicated psychiatric outcome [31, 32].

Though there have been numerous association studies examining the genetic role of *PDE4B* in the etiology of schizophrenia, to date to our knowledge, no comprehensive meta-analysis was conducted to systematically summarize the association of *PDE4B* polymorphisms and schizophrenia. In order to better understand the genetic role of *PDE4B* for schizophrenia susceptibility, we recapitulated the association of different *PDE4B* SNPs with schizophrenia risk in multi-ethnic populations under allelic, dominant and recessive models.

For rs599381, no significant association was found between it and schizophrenia risk in Asian and Caucasian populations under allelic, dominant and recessive models. Sensitivity analysis revealed that this association was not influenced by any individual study. These analyses suggested that the polymorphism rs599381 may be not a risk SNP for schizophrenia, though more large-scale studies are still needed. For the association of rs1040716 with schizophrenia under allelic and recessive models, a large heterogeneity (Table 5) was observed. For Asian subgroup analysis, significant heterogeneity still existed in these two genetic models, indicating that ethnicity may be not the main cause for heterogeneity. However, under dominant model, no heterogeneity existed in Asian and Caucasian populations and a rather small heterogeneity ( $I^2 = 3.6\%$ ) appeared in Asian populations. Sensitivity analysis demonstrated that the statistically significant association between rs1040716 and schizophrenia risk under dominant model was seemingly unstable and correspondingly changed with a certain study deleted (Table 6). On one hand, it is possible that the Bae's study overestimated the pooled effect size. On the other hand, though statistically significant association disappeared when Guan's or Kahler's study was omitted, a careful scrutiny will find that a strong association tendency ( $P = 0.061$ ,  $P = 0.094$ ) still existed. In addition, the new meta-analysis of association between rs1040716 and schizophrenia under dominant model after filling one possible missing study detected by trim and fill analysis remained significant ( $P = 0.017$ ). Therefore, this result should be interpreted with caution and more large-scale replicative studies are necessary to ascertain the relationship. For analysis of rs472952, high heterogeneity was observed in allelic, dominant and recessive genetic models in Asian populations, suggesting that ethnicity may be not responsible for high heterogeneity. In addition, sensitivity analysis showed that heterogeneity dramatically decreased when Guan's study was removed in allelic, dominant, and recessive models (allelic model:  $I^2$  from 88.9% to 37.7%; dominant model:  $I^2$  from 87.7% to 0%; recessive model:  $I^2$  from 78.4% to 0%). We assume that this heterogeneity variation may be not coincidental because similar change was observed in three genetic models. It is highly probable that the significant heterogeneity between studies was attributable partly to geographic factors, age difference in samples (seen from Table 1), lifestyle diversity or sampling difference. For rs2180335, sensitivity analysis displayed that study from Numata may overestimate the pooled odds ratios (Table 6) and therefore the significant association under allelic and dominant model should be cautiously interpreted. As for rs910694, rs4320761, rs498448 and rs6588190, more large-scale replicative studies are required due to their limited cohort number and sample size.

Besides the studies included into our meta-analysis, there are some other studies demonstrating the genetic association between *PDE4B* SNPs and schizophrenia. Pickard et al. [19] identified that two *PDE4B* SNPs, rs2503177 and rs2503166, were significantly associated with schizophrenia in female Scottish case-control populations, conferring a protective effect against schizophrenia in females. Another case-control study [23] revealed that several SNPs within *PDE4B* gene including rs1354064, rs4320761, rs1040716, rs910694, rs1321177, rs2144719 and rs783038 were significantly associated with schizophrenia in Caucasian American population; in addition, rs599381, rs1040716 and rs910694 were shown to be significantly associated with schizophrenia in African American population. In addition, these significantly schizophrenia-associated SNPs are mostly located in introns adjacent to splice junctions, which indicates that

genetic variants in introns surrounding critical splice junctions within the *PDE4B* gene are associated with increased incidence of schizophrenia [23]. Furthermore, a candidate gene association study based on Finnish pedigrees [20] identified that the *PDE4B* SNP rs7412571 was significantly associated with schizophrenia ( $P = 0.018$ ). Two allelic haplotypes of *PDE4B* were observed in statistical significance ( $P = 0.0022$  and  $P = 0.029$ ), increasing or decreasing schizophrenia susceptibility [20].

To conclude, our meta-analysis suggest that rs1040716, rs2180335 and rs4320761 may serve as genetic susceptibility factors for schizophrenia. Moreover, a strong association tendency between rs6588190 and schizophrenia risk was found. However, due to limitations in our meta-analysis, more large-scale studies from different ethnic populations are needed to further ascertain the underlying relationship between *PDE4B* SNPs and predisposition to schizophrenia.

## Supporting Information

### S1 Checklist. PRISMA checklist.

(DOC)

### S2 Checklist. Meta-analysis on genetic association studies form checklist.

(DOCX)

### S1 Text. List of excluded citations and reasons.

(DOCX)

## Acknowledgments

We feel thankful for suggestions about manuscript writing given by Dr. Xiao Feng.

## Author Contributions

Conceived and designed the experiments: YGF YZS. Performed the experiments: YGF DJC CFZ. Analyzed the data: YGF YCL ZYZ. Contributed reagents/materials/analysis tools: YGF JW. Wrote the paper: YGF.

## References

1. Singh S, Kumar A, Agarwal S, Phadke SR, Jaiswal Y. Genetic insight of schizophrenia: past and future perspectives. *Gene*. 2014; 535(2):97–100. Epub 2013/10/22. doi: [10.1016/j.gene.2013.09.110](https://doi.org/10.1016/j.gene.2013.09.110) PMID: [24140491](https://pubmed.ncbi.nlm.nih.gov/24140491/).
2. McCarthy SE, McCombie WR, Corvin A. Unlocking the treasure trove: from genes to schizophrenia biology. *Schizophrenia bulletin*. 2014; 40(3):492–6. Epub 2014/03/29. doi: [10.1093/schbul/sbu042](https://doi.org/10.1093/schbul/sbu042) PMID: [24674812](https://pubmed.ncbi.nlm.nih.gov/24674812/); PubMed Central PMCID: [PMC3984532](https://pubmed.ncbi.nlm.nih.gov/PMC3984532/).
3. Gratten J, Wray NR, Keller MC, Visscher PM. Large-scale genomics unveils the genetic architecture of psychiatric disorders. *Nature neuroscience*. 2014; 17(6):782–90. Epub 2014/05/29. doi: [10.1038/nn.3708](https://doi.org/10.1038/nn.3708) PMID: [24866044](https://pubmed.ncbi.nlm.nih.gov/24866044/); PubMed Central PMCID: [PMC4112149](https://pubmed.ncbi.nlm.nih.gov/PMC4112149/).
4. Sullivan PF, Daly MJ, O'Donovan M. Genetic architectures of psychiatric disorders: the emerging picture and its implications. *Nat Rev Genet*. 2012; 13(8):537–51. Epub 2012/07/11. doi: [10.1038/nrg3240](https://doi.org/10.1038/nrg3240) PMID: [22777127](https://pubmed.ncbi.nlm.nih.gov/22777127/); PubMed Central PMCID: [PMC4110909](https://pubmed.ncbi.nlm.nih.gov/PMC4110909/).
5. Cardno AG, Gottesman, II. Twin studies of schizophrenia: from bow-and-arrow concordances to star wars Mx and functional genomics. *American journal of medical genetics*. 2000; 97(1):12–7. Epub 2000/05/17. PMID: [10813800](https://pubmed.ncbi.nlm.nih.gov/10813800/).
6. Sullivan PF, Kendler KS, Neale MC. Schizophrenia as a complex trait: evidence from a meta-analysis of twin studies. *Arch Gen Psychiatry*. 2003; 60(12):1187–92. Epub 2003/12/10. doi: [10.1001/archpsyc.60.12.1187](https://doi.org/10.1001/archpsyc.60.12.1187) PMID: [14662550](https://pubmed.ncbi.nlm.nih.gov/14662550/).

7. Allen NC, Bagade S, McQueen MB, Ioannidis JP, Kavvoura FK, Khoury MJ, et al. Systematic meta-analyses and field synopsis of genetic association studies in schizophrenia: the SzGene database. *Nat Genet.* 2008; 40(7):827–34. Epub 2008/06/28. doi: [10.1038/ng.171](https://doi.org/10.1038/ng.171) PMID: [18583979](https://pubmed.ncbi.nlm.nih.gov/18583979/).
8. Stefansson H, Ophoff RA, Steinberg S, Andreassen OA, Cichon S, Rujescu D, et al. Common variants conferring risk of schizophrenia. *Nature.* 2009; 460(7256):744–7. Epub 2009/07/03. doi: [10.1038/nature08186](https://doi.org/10.1038/nature08186) PMID: [19571808](https://pubmed.ncbi.nlm.nih.gov/19571808/); PubMed Central PMCID: [PMC3077530](https://pubmed.ncbi.nlm.nih.gov/PMC3077530/).
9. Szpirer C, Szpirer J, Riviere M, Swinnen J, Vicini E, Conti M. Chromosomal localization of the human and rat genes (*PDE4D* and *PDE4B*) encoding the cAMP-specific phosphodiesterases 3 and 4. *Cytogenetics and cell genetics.* 1995; 69(1–2):11–4. Epub 1995/01/01. PMID: [7835077](https://pubmed.ncbi.nlm.nih.gov/7835077/).
10. Houslay MD, Adams DR. *PDE4* cAMP phosphodiesterases: modular enzymes that orchestrate signaling cross-talk, desensitization and compartmentalization. *The Biochemical journal.* 2003; 370(Pt 1):1–18. Epub 2002/11/26. doi: [10.1042/bj20021698](https://doi.org/10.1042/bj20021698) PMID: [12444918](https://pubmed.ncbi.nlm.nih.gov/12444918/); PubMed Central PMCID: [PMCPmc1223165](https://pubmed.ncbi.nlm.nih.gov/PMCPmc1223165/).
11. Davis RL, Cherry J, Dauwalder B, Han PL, Skoulakis E. The cyclic AMP system and *Drosophila* learning. *Molecular and cellular biochemistry.* 1995; 149–150:271–8. Epub 1995/08/01. PMID: [8569740](https://pubmed.ncbi.nlm.nih.gov/8569740/).
12. Millar JK, Pickard BS, Mackie S, James R, Christie S, Buchanan SR, et al. *DISC1* and *PDE4B* are interacting genetic factors in schizophrenia that regulate cAMP signaling. *Science (New York, NY).* 2005; 310(5751):1187–91. Epub 2005/11/19. doi: [10.1126/science.1112915](https://doi.org/10.1126/science.1112915) PMID: [16293762](https://pubmed.ncbi.nlm.nih.gov/16293762/).
13. Mackie S, Millar JK, Porteous DJ. Role of *DISC1* in neural development and schizophrenia. *Current opinion in neurobiology.* 2007; 17(1):95–102. Epub 2007/01/30. doi: [10.1016/j.conb.2007.01.007](https://doi.org/10.1016/j.conb.2007.01.007) PMID: [17258902](https://pubmed.ncbi.nlm.nih.gov/17258902/).
14. Owen MJ, Craddock N, O'Donovan MC. Schizophrenia: genes at last? *Trends in genetics: TIG.* 2005; 21(9):518–25. Epub 2005/07/13. doi: [10.1016/j.tig.2005.06.011](https://doi.org/10.1016/j.tig.2005.06.011) PMID: [16009449](https://pubmed.ncbi.nlm.nih.gov/16009449/).
15. Porteous DJ, Millar JK. Disrupted in schizophrenia 1: building brains and memories. *Trends in molecular medicine.* 2006; 12(6):255–61. Epub 2006/05/09. doi: [10.1016/j.molmed.2006.04.009](https://doi.org/10.1016/j.molmed.2006.04.009) PMID: [16679065](https://pubmed.ncbi.nlm.nih.gov/16679065/).
16. Karam CS, Ballon JS, Bivens NM, Freyberg Z, Girgis RR, Lizardi-Ortiz JE, et al. Signaling pathways in schizophrenia: emerging targets and therapeutic strategies. *Trends in pharmacological sciences.* 2010; 31(8):381–90. Epub 2010/06/29. doi: [10.1016/j.tips.2010.05.004](https://doi.org/10.1016/j.tips.2010.05.004) PMID: [20579747](https://pubmed.ncbi.nlm.nih.gov/20579747/); PubMed Central PMCID: [PMCPmc3635536](https://pubmed.ncbi.nlm.nih.gov/PMCPmc3635536/).
17. Brandon NJ, Sawa A. Linking neurodevelopmental and synaptic theories of mental illness through *DISC1*. *Nature reviews Neuroscience.* 2011; 12(12):707–22. Epub 2011/11/19. doi: [10.1038/nrn3120](https://doi.org/10.1038/nrn3120) PMID: [22095064](https://pubmed.ncbi.nlm.nih.gov/22095064/); PubMed Central PMCID: [PMCPmc3954824](https://pubmed.ncbi.nlm.nih.gov/PMCPmc3954824/).
18. Holliday EG, Nyholt DR, Tirupati S, John S, Ramachandran P, Ramamurti M, et al. Strong Evidence for a Novel Schizophrenia Risk Locus on Chromosome 1p31.1 in Homogeneous Pedigrees From Tamil Nadu, India. *American Journal of Psychiatry.* 2009; 166(2):206–15. doi: [10.1176/appi.ajp.2008.08030442](https://doi.org/10.1176/appi.ajp.2008.08030442) PMID: [WOS:000263031500014](https://pubmed.ncbi.nlm.nih.gov/WOS:000263031500014/).
19. Pickard BS, Thomson PA, Christoforou A, Evans KL, Morris SW, Porteous DJ, et al. The *PDE4B* gene confers sex-specific protection against schizophrenia. *Psychiatric genetics.* 2007; 17(3):129–33. Epub 2007/04/10. doi: [10.1097/YPG.0b013e328014492b](https://doi.org/10.1097/YPG.0b013e328014492b) PMID: [17417055](https://pubmed.ncbi.nlm.nih.gov/17417055/).
20. Tomppo L, Hennah W, Lahermo P, Loukola A, Tuulio-Henriksson A, Suvisaari J, et al. Association Between Genes of Disrupted in Schizophrenia 1 (*DISC1*) Interactors and Schizophrenia Supports the Role of the *DISC1* Pathway in the Etiology of Major Mental Illnesses. *Biological psychiatry.* 2009; 65(12):1055–62. doi: [10.1016/j.biopsych.2009.01.014](https://doi.org/10.1016/j.biopsych.2009.01.014) PMID: [WOS:000266753300008](https://pubmed.ncbi.nlm.nih.gov/WOS:000266753300008/).
21. Kahler AK, Otnaess MK, Wirgenes KV, Hansen T, Jonsson EG, Agartz I, et al. Association study of *PDE4B* gene variants in Scandinavian schizophrenia and bipolar disorder multicenter case-control samples. *American journal of medical genetics Part B, Neuropsychiatric genetics: the official publication of the International Society of Psychiatric Genetics.* 2010; 153b(1):86–96. Epub 2009/04/08. doi: [10.1002/ajmg.b.30958](https://doi.org/10.1002/ajmg.b.30958) PMID: [19350560](https://pubmed.ncbi.nlm.nih.gov/19350560/).
22. Rastogi A, Zai C, Likhodi O, Kennedy JL, Wong AH. Genetic association and post-mortem brain mRNA analysis of *DISC1* and related genes in schizophrenia. *Schizophrenia research.* 2009; 114(1–3):39–49. Epub 2009/07/28. doi: [10.1016/j.schres.2009.06.019](https://doi.org/10.1016/j.schres.2009.06.019) PMID: [19632097](https://pubmed.ncbi.nlm.nih.gov/19632097/).
23. Fatemi SH, King DP, Reutiman TJ, Folsom TD, Laurence JA, Lee S, et al. *PDE4B* polymorphisms and decreased *PDE4B* expression are associated with schizophrenia. *Schizophrenia research.* 2008; 101(1–3):36–49. Epub 2008/04/09. doi: [10.1016/j.schres.2008.01.029](https://doi.org/10.1016/j.schres.2008.01.029) PMID: [18394866](https://pubmed.ncbi.nlm.nih.gov/18394866/).
24. Numata S, Ueno S, Iga J, Song H, Nakatani M, Tayoshi S, et al. Positive association of the *PDE4B* (phosphodiesterase 4B) gene with schizophrenia in the Japanese population. *Journal of psychiatric research.* 2008; 43(1):7–12. Epub 2008/03/11. doi: [10.1016/j.jpsychires.2008.01.013](https://doi.org/10.1016/j.jpsychires.2008.01.013) PMID: [18329668](https://pubmed.ncbi.nlm.nih.gov/18329668/).

25. Guan F, Zhang C, Wei S, Zhang H, Gong X, Feng J, et al. Association of PDE4B polymorphisms and schizophrenia in Northwestern Han Chinese. *Human genetics*. 2012; 131(7):1047–56. Epub 2011/12/14. doi: [10.1007/s00439-011-1120-8](https://doi.org/10.1007/s00439-011-1120-8) PMID: [22160351](https://pubmed.ncbi.nlm.nih.gov/22160351/).
26. Bae JS, Park BL, Cheong HS, Kim JH, Kim JY, Namgoong S, et al. Association analysis of PDE4B polymorphisms with schizophrenia and smooth pursuit eye movement abnormality in a Korean population. *General physiology and biophysics*. 2015. Epub 2015/05/01. doi: [10.4149/gpb\\_2015004](https://doi.org/10.4149/gpb_2015004) PMID: [25926551](https://pubmed.ncbi.nlm.nih.gov/25926551/).
27. Little J, Higgins JP, Ioannidis JP, Moher D, Gagnon F, von Elm E, et al. Strengthening the REporting of Genetic Association Studies (STREGA): an extension of the STROBE statement. *PLoS medicine*. 2009; 6(2):e22. doi: [10.1371/journal.pmed.1000022](https://doi.org/10.1371/journal.pmed.1000022) PMID: [19192942](https://pubmed.ncbi.nlm.nih.gov/19192942/); PubMed Central PMCID: PMC2634792.
28. Shi WL, Tang HL, Zhai SD. Effects of the CYP3A4\*1B Genetic Polymorphism on the Pharmacokinetics of Tacrolimus in Adult Renal Transplant Recipients: A Meta-Analysis. *PloS one*. 2015; 10(6):e0127995. doi: [10.1371/journal.pone.0127995](https://doi.org/10.1371/journal.pone.0127995) PMID: [26039043](https://pubmed.ncbi.nlm.nih.gov/26039043/); PubMed Central PMCID: PMC4454552.
29. Duval S, Tweedie R. Trim and fill: A simple funnel-plot-based method of testing and adjusting for publication bias in meta-analysis. *Biometrics*. 2000; 56(2):455–63. Epub 2000/07/06. PMID: [10877304](https://pubmed.ncbi.nlm.nih.gov/10877304/).
30. Dudbridge F, Gusnanto A. Estimation of significance thresholds for genome-wide association scans. *Genetic epidemiology*. 2008; 32(3):227–34. doi: [10.1002/gepi.20297](https://doi.org/10.1002/gepi.20297) PMID: [18300295](https://pubmed.ncbi.nlm.nih.gov/18300295/); PubMed Central PMCID: PMC2573032.
31. Kaiya H. Second messenger imbalance hypothesis of schizophrenia. *Prostaglandins, leukotrienes, and essential fatty acids*. 1992; 46(1):33–8. Epub 1992/05/01. PMID: [1352895](https://pubmed.ncbi.nlm.nih.gov/1352895/).
32. Siuciak JA. The role of phosphodiesterases in schizophrenia: therapeutic implications. *CNS drugs*. 2008; 22(12):983–93. Epub 2008/11/13. doi: [10.2165/0023210-200822120-00002](https://doi.org/10.2165/0023210-200822120-00002) PMID: [18998737](https://pubmed.ncbi.nlm.nih.gov/18998737/).
